# Supplementary material for: Raman endoscopy for monitoring the anticancer drug treatment of colorectal tumors in live mice
Source: Royal Society of Chemistry journal article supplement (doi:10.1039/c7an00720e), 2017-01-01
Supplement: c7an00720e1.pdf [file c7an00720e1.pdf]

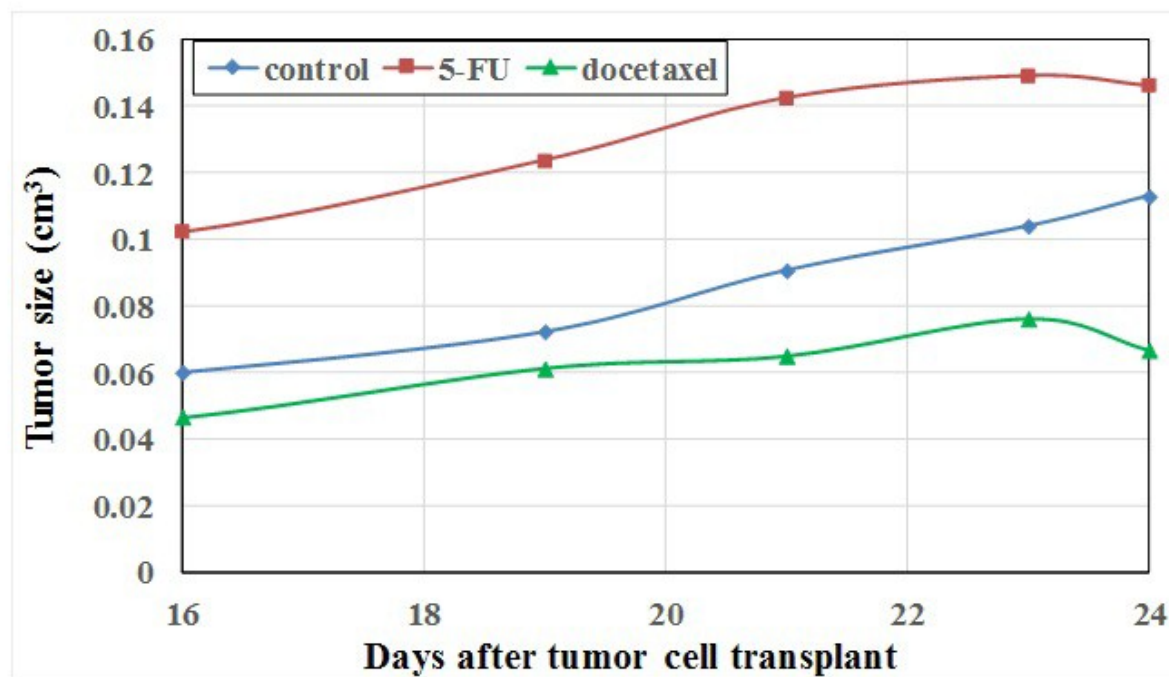

Supplemental Fig. 1

Tumor size in subcutaneous mouse models of DLD-1 (human colon adenocarcinoma cell line). Anticancer drugs, 5-FU and docetaxel, were administered at day 21. The tumor size reduced only 3 days after the drug treatments.
